# Supplementary material
Source: PubMed Central journal article supplement (PMC6340292)

**Supplementary Table 1. Previously utilized nomenclature for PLC with combinations of hepatocytic and cholangiocytic features**

Combined hepatocellular-cholangiocarcinoma  
Mixed hepatobiliary carcinoma  
Biphenotypic (hepatobiliary) primary liver carcinoma  
Combined liver cell and bile duct carcinoma  
HCC with dual phenotype  
HCC with stem/progenitor cell immunophenotype  
Cholangiolocarcinoma  
Cholangiolocellular carcinoma  
Intermediate HCC  
Stem cell tumor

**Supplementary Table 2. Comparison of past and current nomenclatures of PLCs**

| <b>Descriptive Classification</b>                                                | <b>2010 WHO Classification</b>           | <b>2017 Revised International Consensus Terminology</b>           |
|----------------------------------------------------------------------------------|------------------------------------------|-------------------------------------------------------------------|
| "Classic" HCC<br><i>without</i> cholangiocyte or stem/progenitor cell marker IHC | HCC                                      | HCC                                                               |
| "Classic" HCC<br><i>with</i> cholangiocyte or stem/progenitor cell marker IHC    | HCC, NOS                                 | HCC<br>- List marker staining and % of tumor positivity in report |
| "Classic" HCC with stem/progenitor cell features noted by H & E                  | HCC, NOS                                 | HCC<br>-stem cell features/phenotypes noted in report             |
| "Classic" iCCA<br>without IHC for hepatocyte markers                             | iCCA, NOS                                | iCCA                                                              |
| "Classic" iCCA<br>with IHC for hepatocyte markers                                | iCCA, unclassified                       | iCCA<br>-List hepatocyte markers and % positivity in report       |
| cHCC-CC                                                                          | cHCC-CC                                  | cHCC-CCa                                                          |
| cHCC-CC with "typical" stem/progenitor cell features                             | cHCC-CC ,<br>"typical" stem cell subtype | -List each component and % in report                              |
| Cholangiolocarcinoma                                                             | Cholangiolocarcinoma                     | Cholangiolocarcinoma                                              |
| Cholangiolo-predominant carcinomas with HCC component                            | Unclassified                             | cHCC-CLC<br>-List each component and % in report                  |
| Cholangiolocarcinoma present within iCCA                                         | Unclassified                             | ciCCA-CLC<br>-List each component and % in report                 |

|                                                                      |                                                     |                                                                  |
|----------------------------------------------------------------------|-----------------------------------------------------|------------------------------------------------------------------|
| <p>Cholangiolo-<br/>predominant carcinomas<br/>with HCC and iCCA</p> | <p>cHCC-CC,<br/>cholangiolocellular<br/>subtype</p> | <p>cHCC-CCA-CLC<br/>-List each component and %<br/>in report</p> |
| <p>cHCC-CC with<br/>“intermediate” features</p>                      | <p>“intermediate” stem<br/>cell subtype</p>         | <p>Intermediate cell carcinoma</p>                               |

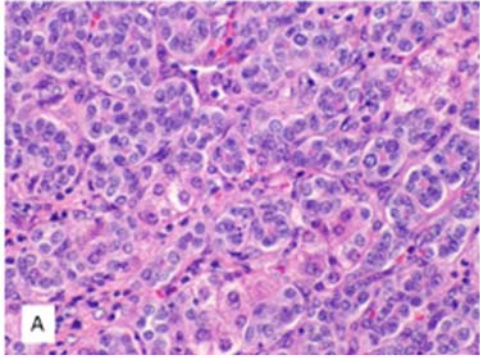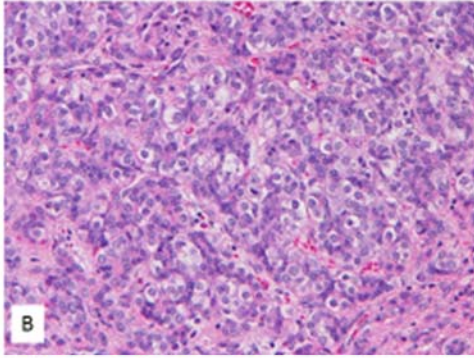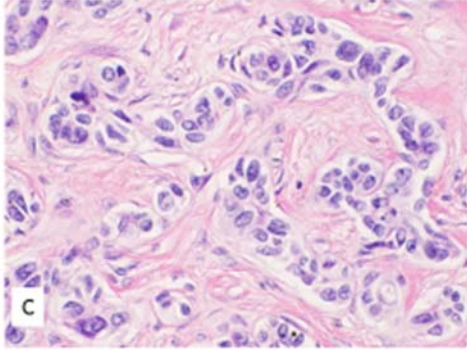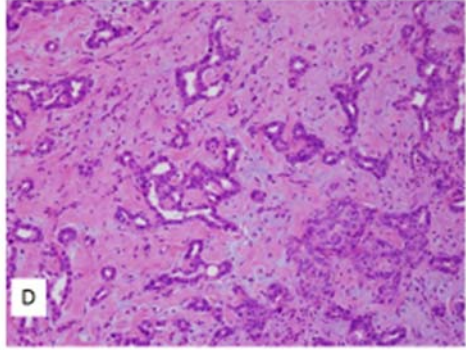

Supplement: NIHMS1003104-supplement-BruntHep2018_Supp1.pdf [file NIHMS1003104-supplement-BruntHep2018_Supp1.pdf]
